# Supplementary material for: Catalyst-free tosylation of lipophilic alcohols in water
Source: Royal Society of Chemistry journal article supplement (doi:10.1039/c2ra23067d), 2012-12-21

## **Catalyst free tosylation of lipophylic alcohols in water.**

**Manuela Oliverio,<sup>\*[a]</sup> Paola Costanzo,<sup>[a]</sup> Rosina Paonessa,<sup>[a]</sup> Monica Nardi<sup>[b]</sup> and  
Antonio Procopio<sup>[a]</sup>**

### **Supplementary Informations**

## Table of Contents

|                                              |          |
|----------------------------------------------|----------|
| <b>Experimental</b>                          | <b>3</b> |
| <b>MW-assisted Synthesis of Tosyl esters</b> | <b>4</b> |
| <b>GC-EI/MS Spectra:</b>                     |          |
| - Sample 2                                   | 6        |
| - Sample 8                                   | 7        |
| - Sample 14                                  | 8        |
| - Sample 15                                  | 9        |
| - Sample 16                                  | 10       |
| - Sample 18                                  | 11       |
| <b><sup>1</sup>H-NMR Spectra</b>             |          |
| - Sample 2                                   | 12       |
| - Sample 8                                   | 13       |
| - Sample 14                                  | 14       |
| - Sample 15                                  | 15       |
| - Sample 16                                  | 16       |
| - Sample 18                                  | 17       |
| <b><sup>13</sup>C-NMR Spectra</b>            |          |
| - Sample 8                                   | 18       |
| - Sample 14                                  | 19       |
| - Sample 15                                  | 20       |
| - Sample 16                                  | 21       |
| - Sample 18                                  | 22       |

## Experimental

$^1\text{H}$  and  $^{13}\text{C}$ -NMR spectra were recorded on a Bruker WM 300 and on Bruker Avance 500 instruments respectively, at 298 K, on samples dissolved in  $\text{CDCl}_3$ . Chemical shifts are given in parts per million (ppm) from tetramethylsilane as the internal standard (0.0 ppm). Coupling constants (J) are given in Hertz. Reactions were monitored by a GC–MS Thermo Scientific workstation, formed by a Focus GC (30-m VARIAN-VF-5ms, 0.25 mm diameter capillary column, working on splitless mode, 1.2 mL/min He as carrier gas) and by an DSQ II mass detector. MW-assisted reactions were performed in Synthos 3000 instrument from Anton Paar, equipped with a 64MG5 rotor and an IR probe as external control of the temperature. Using a temperature controlled program the instrument is able to tune the power magnetron in order to reach and to maintain the fixed temperature throughout the experiment. For each run 16 positions of the rotor were occupied by 0.3-3 ml glass vials sealed with a dedicated PEEK screw-cup together with a reliable PTFE seal. The high-power US-bath (19.6 kHz) for irradiation at 20 kHz were made by Danacamerini (Torino). TLC were performed using silica plates 60-F264 on alumina, commercially available from Merk. Liquid Flash chromatography was performed on a Supelco VERSA FLASH HTFP station on silica cartridges commercially available from Supelco. All solvents were distilled before using by standard methods. All chemicals were used as commercially available.

## MW-assisted synthesis of Tosyl esters

In a general procedure 25 mg of alcohol were suspended in 1.0 ml of water and 1.2 equivalents of Ts<sub>2</sub>O were added in a 0.3-3 ml glass vials from Anton Paar sealed with a dedicated PEEK screw-cup together with a reliable PTFE seal. The mixture was reacted in “power controlled mode” for 15 min. runs in a Synthos 3000 instrument from Anton Paar, equipped with a 64MG5 rotor and an IR probe as external control of the temperature, fixed on the temperature value of 110°C. On completion, monitored by TLC, the crude product was separated from the *p*-toluenesulfonic acid by extraction with CH<sub>2</sub>Cl<sub>2</sub>. The organic phases collected were dried on Na<sub>2</sub>SO<sub>4</sub>, filtered and then evaporated under vacuum giving rise to the pure product.

**Pent-4-enyl-4-methylbenzenesulfonate (2).** Colourless oil. Yield 15%; R<sub>f</sub> (Hexane - Ethyl acetate 8:2) 0.48; <sup>1</sup>H-NMR: δ (ppm)(300MHz, CDCl<sub>3</sub>): 7.7 (d, 2H, H<sub>M</sub>,H<sub>P</sub>,J=8Hz), 7.4 (d, 2H, H<sub>N</sub>,H<sub>O</sub>,J=9Hz), 5.67-5.75 (m, 1H, H<sub>C</sub>), 4.90-5.00 (m, 2H, H<sub>A</sub>,H<sub>B</sub>), 4.05(t, 2H, H<sub>H</sub>,H<sub>I</sub>, J=7Hz), 2.45 (sb, 3H,H<sub>L</sub>), 2.06-2.13 (m, 2H,H<sub>D</sub>,H<sub>E</sub>), 1.68-1.78 (m, 2H, H<sub>F</sub>,H<sub>G</sub>).; m/z: 240 [M]<sup>+</sup>, 155 [CH<sub>3</sub>-Ph-SO<sub>2</sub>]<sup>+</sup>, 91 [CH<sub>3</sub>-Ph]<sup>+</sup>, 68 [M-TsOH]<sup>+</sup>.

**Octadecyl-9-enyl 4-methylbenzenesulfonate (8).** Colourless oil. Yield 96%; R<sub>f</sub> (Hexane - Ethyl acetate 9:1) 0.45; <sup>1</sup>H-NMR: δ (ppm)(300MHz, CDCl<sub>3</sub>): 7.8 (d, 2H, H<sub>N</sub>, J=8.2Hz), 7.35 (d, 2H, H<sub>M</sub>, J=8Hz), 5.30-5.40 (m, 2H, H<sub>A</sub>), 4.3 (t, 2H, H<sub>C</sub>, J=7Hz), 2.45 (s, 3H, H<sub>L</sub>), 2.05-1.92 (m, 4H, H<sub>B</sub>), 1.57-1.67 (m, 2H, H<sub>F</sub>), 1.4-1.2. (m, 22H), 0.87(t 3H, H<sub>I</sub>, J=6.6Hz); <sup>13</sup>C-NMR: δ (ppm)(500MHz, CDCl<sub>3</sub>): 144.57, 133.44, 130.03, 129.80, 129.75, 127.90, 70.76, 31.92, 29.79, 29.70, 29.54 29.33, 29.39, 29.16, 28.93, 28.86, 27.24, 27.17, 25.36, 22.68, 21.61, 14.10. m/z: 155 [CH<sub>3</sub>-Ph-SO<sub>2</sub>]<sup>+</sup>, 250,3 [M-TsOH]<sup>+</sup>, 91 [CH<sub>3</sub>-Ph]<sup>+</sup>

**4-ethylphenyl 4-methylbenzenesulfonate (14).** Colourless oil. Yield 76%; R<sub>f</sub> (Hexane - Ethyl acetate 9:1) 0.70; <sup>1</sup>H-NMR: δ (ppm)(300MHz, CDCl<sub>3</sub>): 7.7 (d, 2H, H<sub>F</sub>,J=9Hz), 7.3 (d, 2H, H<sub>G</sub>,J=8Hz), 7.07 (d, 2H, H<sub>A</sub>,J=9Hz), 7.87 (d, 2H, H<sub>B</sub>,J=8Hz), 2.6 (q, 2H, H<sub>C</sub>), 2.45(s 3H,H<sub>E</sub>), 1.2 (t 3H, H<sub>D</sub>, J=7Hz); <sup>13</sup>C-NMR: δ (ppm)(500MHz, CDCl<sub>3</sub>): 147.60, 145.17, 143.17, 129.69, 128.87, 128.52, 122.11, 28.22, 21.70, 15.37. m/z=: 276,1 [M]<sup>+</sup>, 155 [CH<sub>3</sub>-Ph-SO<sub>2</sub>]<sup>+</sup>, 121,1 [M- CH<sub>3</sub>-Ph-SO<sub>2</sub>]<sup>+</sup>, 91 [CH<sub>3</sub>-Ph]<sup>+</sup>.

***o*-tolyl-4-methylbenzenesulfonate (15).** Colourless oil. Yield 56%; R<sub>f</sub> (Hexane - Ethyl acetate 9:1) 0.53; <sup>1</sup>H-NMR: δ (ppm)(300MHz, CDCl<sub>3</sub>): 7.74 (d, 2H, H<sub>C</sub>, H<sub>E</sub> J=9Hz), 7.33 (d, 2H, H<sub>B</sub>, H<sub>D</sub> J=8Hz), 7.16-6.95 (m, 4H, H<sub>H</sub>, H<sub>F</sub> H<sub>I</sub> H<sub>G</sub>), 2.48 (s, 3H, H<sub>L</sub>), 2.08 (s 3H, H<sub>A</sub>); <sup>13</sup>C-NMR: δ (ppm)(500MHz, CDCl<sub>3</sub>): 148.43, 145.26, 131.65, 131.58, 129.78, 126.95, 126.90, 122.32, 21.70, 16.30. m/z=: 262.1 [M]<sup>+</sup>, 155 [CH<sub>3</sub>-Ph-SO<sub>2</sub>]<sup>+</sup>, 107 [M- CH<sub>3</sub>-Ph-SO<sub>2</sub>]<sup>+</sup>, 91 [CH<sub>3</sub>-Ph]<sup>+</sup>

**4-bromophenyl 4-methylbenzenesulfonate (16).** Colourless oil. Yield 62%; Rf (Petroleum ether - Ethyl ether 8.5:1.5) 0.76; <sup>1</sup>H-NMR: δ (ppm)(300MHz, CDCl<sub>3</sub>): 7.7 (d, 2H, H<sub>C</sub> J=8Hz), 7.4 (m, 2H, H<sub>D</sub>), 7.33 (d, 2H, H<sub>B</sub>, J=9Hz), 6.86 (m, 2H, H<sub>E</sub>), 2.45 (s 3H, H<sub>A</sub>); <sup>13</sup>C-NMR: δ (ppm)(500MHz, CDCl<sub>3</sub>): 148.66, 145.65, 132.74, 129.87, 128.55, 124.17, 120.58, 21.73. m/z=: 326 [M]<sup>+</sup>, 328 (50%) [M+2]<sup>+</sup>, 155 [CH<sub>3</sub>-Ph-SO<sub>2</sub>]<sup>+</sup>, 91 [CH<sub>3</sub>-Ph]<sup>+</sup>

**2-allylphenyl 4-methylbenzenesulfonate (18).** Colourless oil. Yield 60%; Rf (Hexane - Ethyl acetate 9:1) 0.65; <sup>1</sup>H-NMR: δ (ppm)(300MHz, CDCl<sub>3</sub>): 7.76 (d, 2H, H<sub>L</sub>, H<sub>I</sub>, J=8Hz), 7.35 (d, 2H, H<sub>M</sub>, H<sub>H</sub>, J=9Hz), 7-7.22 (m, 4H, H<sub>G</sub>, H<sub>F</sub>, H<sub>E</sub>, H<sub>D</sub>), 5.68-5.83 (m, 1H, H<sub>C</sub>), 4.95-5.07(m, 2H, H<sub>A</sub>, H<sub>B</sub>), 3.22. (ddd, 2H<sub>P</sub>, J<sub>P-C</sub>=1.37Hz; J<sub>P-B</sub>=5.5Hz), 2.45(s 3H, H<sub>N</sub>); <sup>13</sup>C-NMR: δ (ppm)(500MHz, CDCl<sub>3</sub>): 147.86, 145.35, 135.52, 133.44, 130.68, 129.69, 128.43, 127.37, 127.09, 122.27, 116.64, 33.92, 21.72. m/z=: 288.1 [M]<sup>+</sup>, 155 [CH<sub>3</sub>-Ph-SO<sub>2</sub>]<sup>+</sup>, 115,1 [M-TsOH]<sup>+</sup>, 91 [CH<sub>3</sub>-Ph]<sup>+</sup>

## EI/MS Spectra

### Sample 2

Data File: TOS30\_bis  
Operator: ross  
Acquisition Date: 10/10/11 04:27:42 PM  
Run Time(min): 26.51  
Instrument Method: C:\Xcalibur\methods\ecococontrol400

RT: 0.00 - 30.51

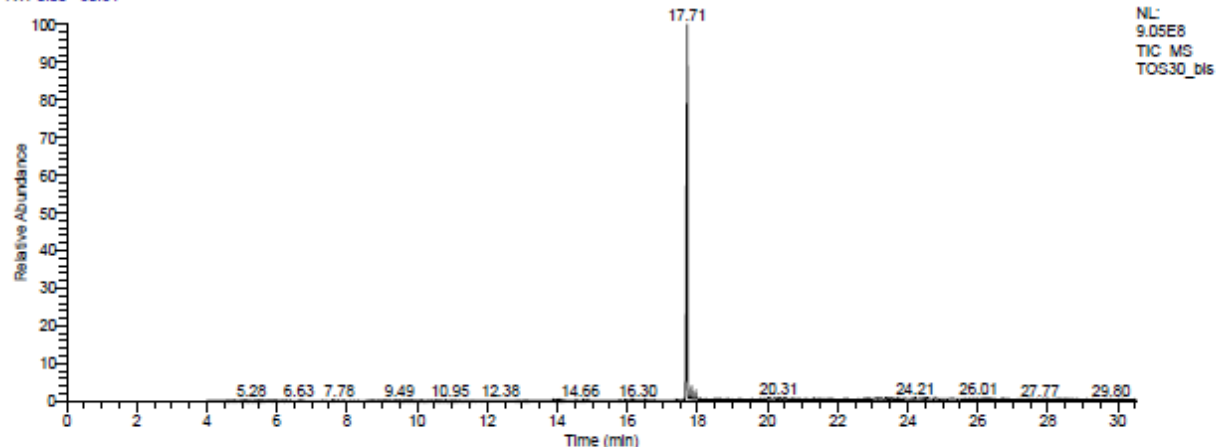

| RT    | Peak Area     | Peak Height  | Area % | S/N       |
|-------|---------------|--------------|--------|-----------|
| 17.73 | 78636501.85   | 31080402.61  | 4.30   | 5633.31   |
| 17.71 | 1749476366.35 | 870495062.15 | 95.70  | 157776.80 |

TOS30\_bis #7861 RT: 17.71 AV: 1 AV: 5 SB: 12 7854-7859 7863-7868 NL: 2.45E8  
F: -c Full ms (50.00-400.00)

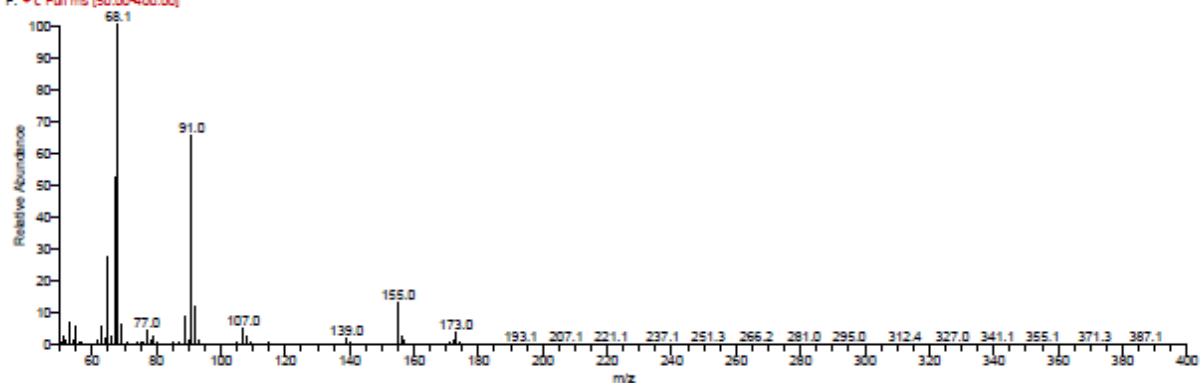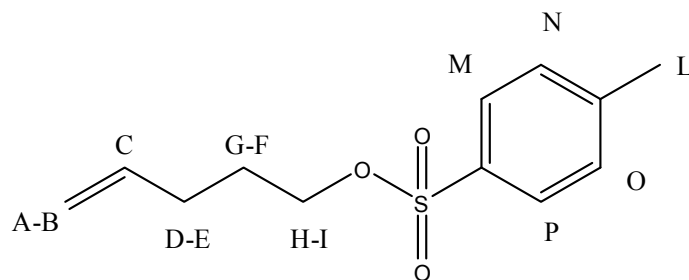

### Sample 8

Data File:  
 Operator:  
 Acquisition Date:  
 Run Time(min):  
 Instrument Method:

tos72grezzo\_bis  
 ross  
 07/21/11 05:15:15 PM  
 37.51

RT: 0.00 - 41.51

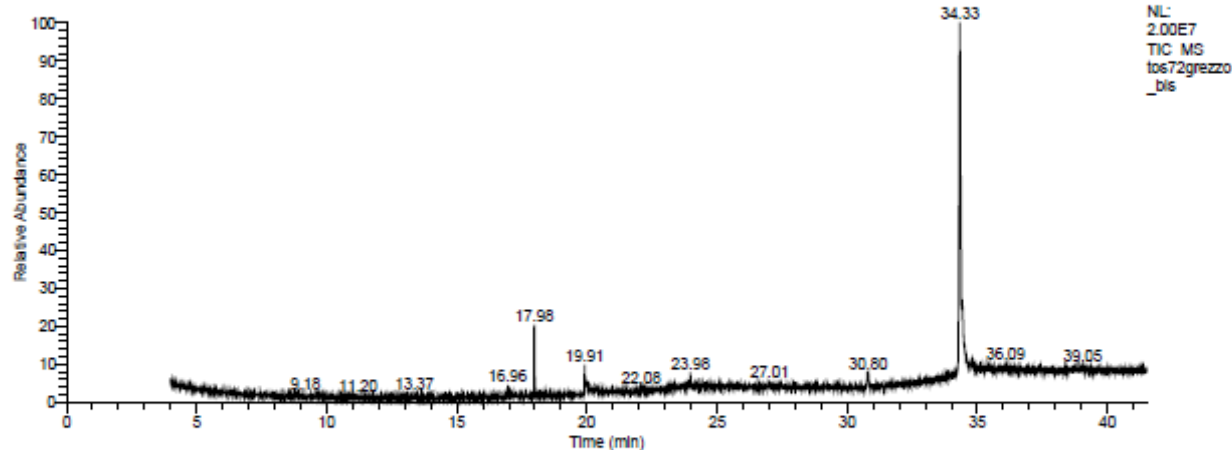

NL:  
 2.00E7  
 TIC: MS  
 tos72grezzo\_bis

| RT    | Peak Area   | Peak Height | Area % | S/N     |
|-------|-------------|-------------|--------|---------|
| 23.98 | 1709960.14  | 761145.69   | 2.02   | 232.96  |
| 19.91 | 2644154.02  | 1472660.05  | 3.12   | 450.72  |
| 30.80 | 3718389.67  | 783664.35   | 4.38   | 239.85  |
| 17.98 | 5806164.67  | 3658944.33  | 6.85   | 1119.85 |
| 34.33 | 70925082.07 | 17549609.00 | 83.63  | 5371.22 |

tos72grezzo\_bis #14188 RT: 34.33 AV: 1 AV: 5 8B: 12 14181-14186 14190-14195 NL: 1.56E5  
 F: - c Full ms (50.00-500.00)

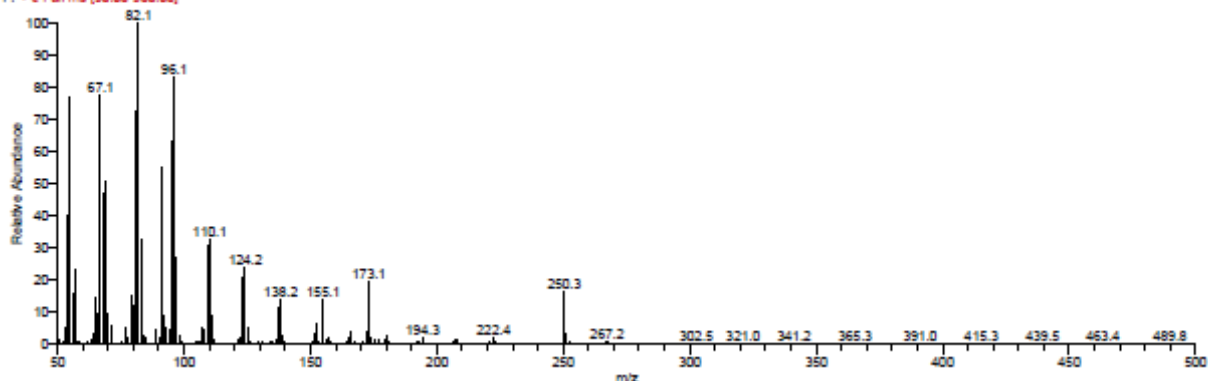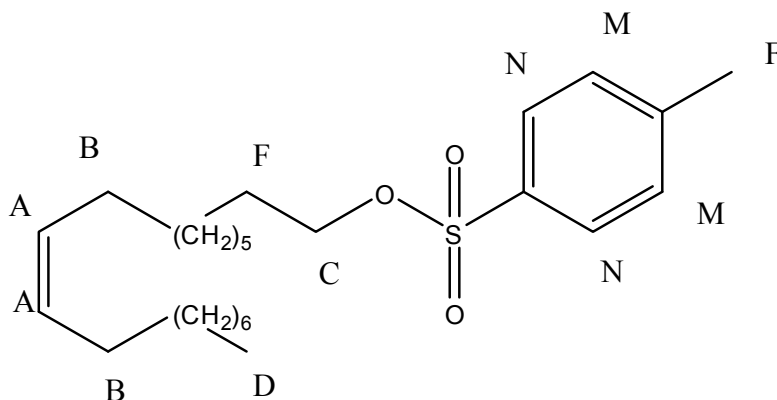

## Sample 14

Data File:  
Operator:  
Acquisition Date:  
Run Time(min):  
Instrument Method:

TOS81\_grezzo  
Paola  
07/27/11 04:33:38 PM  
26.51

RT: 0.00 - 30.51

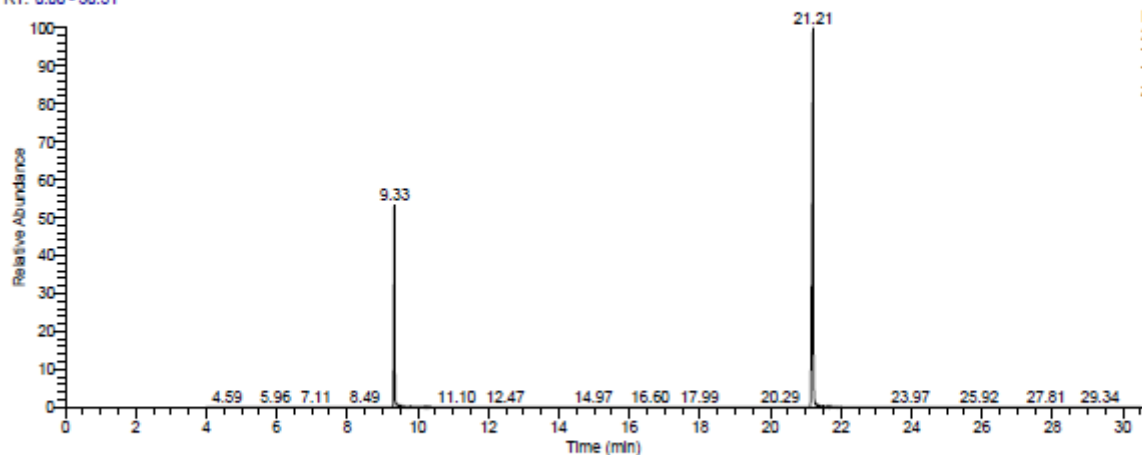

| RT    | Peak Area     | Peak Height   | Area % | S/N       |
|-------|---------------|---------------|--------|-----------|
| 9.34  | 1671845719.25 | 1076144799.34 | 23.75  | 372204.76 |
| 21.21 | 5367587948.88 | 2005486493.65 | 76.25  | 693634.93 |

TOS81\_grezzo #9891 RT: 21.21 AV: 1 AV: 5 SB: 12 9884-9889 9893-9898 NL: 4.93E8  
F: + c Full ms [50.00-400.00]

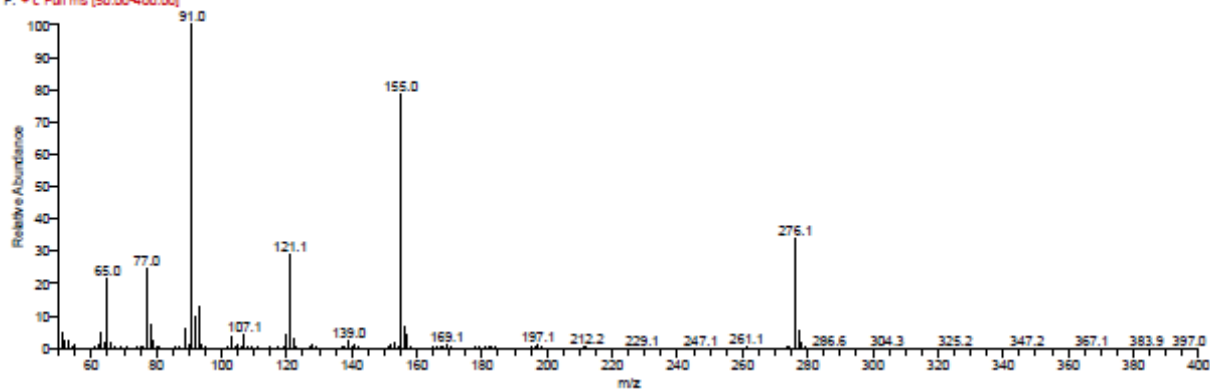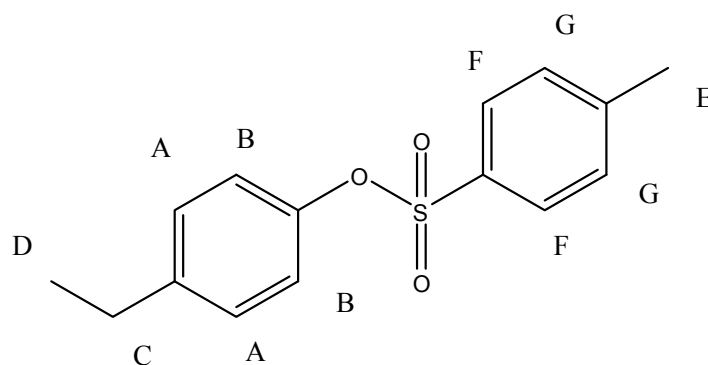



## Sample 15

Data File: TOS83\_grezzo  
Operator: Paola  
Acquisition Date: 07/28/11 10:17:43 AM  
Run Time(min): 26.53  
Instrument Method: C:\Xcalibur\methods\ecoccontrol400.meth

RT: 0.00 - 30.53

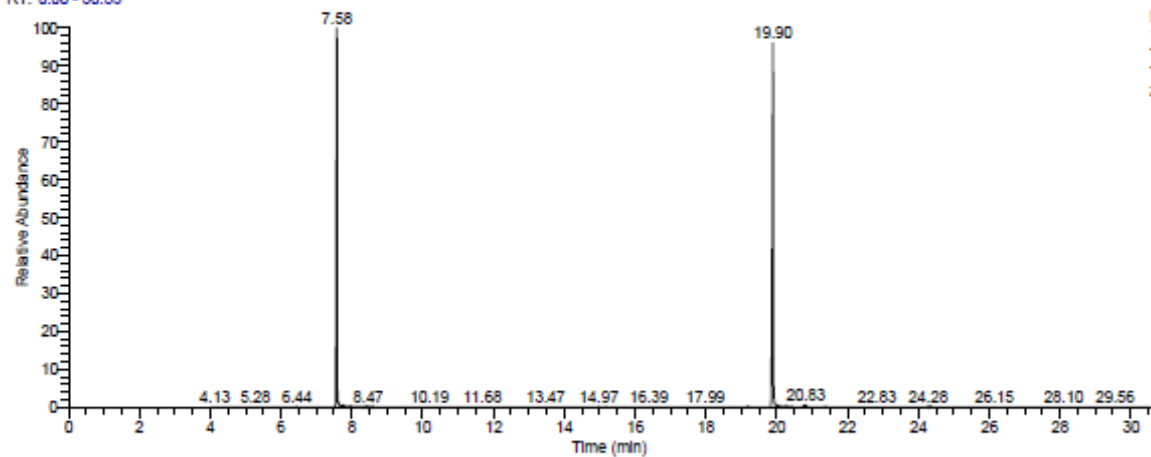

NL:  
1.50E9  
TIC MS  
TOS83\_gre  
zzo

| RT    | Peak Area     | Peak Height   | Area % | S/N       |
|-------|---------------|---------------|--------|-----------|
| 7.58  | 2240226578.83 | 1434923513.24 | 43.57  | 536576.25 |
| 19.90 | 2901236488.44 | 1413864830.51 | 56.43  | 528701.55 |

TOS83\_grezzo #9138 RT: 19.90 AV: 1 AV: 5 SB: 12 9131-9136 9140-9145 NL: 4.02E8  
F: - c Full ms (50.00-400.00)

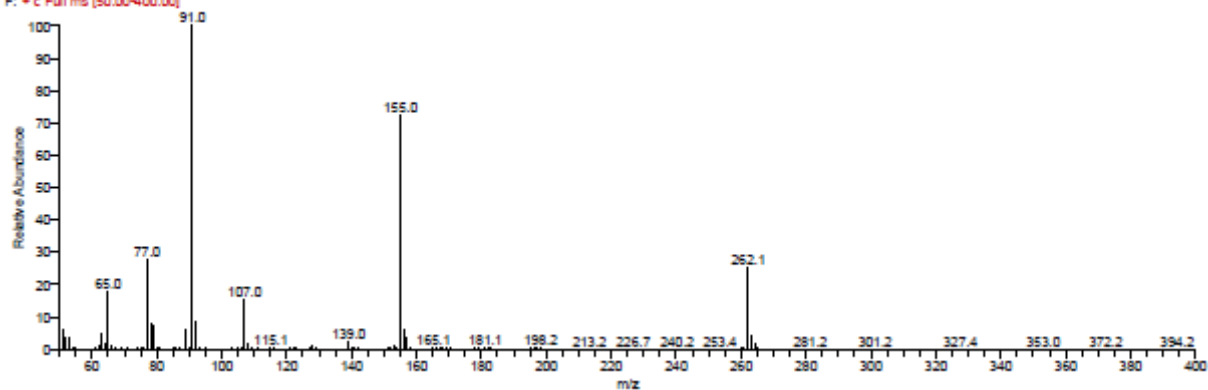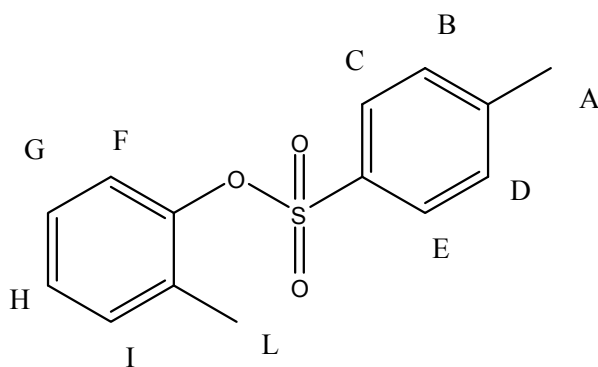

### Sample 16

Data File:  
 Operator:  
 Acquisition Date:  
 Run Time(min):  
 Instrument Method:

TOS85\_grezzo  
 sonia  
 07/28/11 11:26:43 AM  
 26.52  
 C:\Xcalibur\methods\ecoccontrol400

RT: 0.00 - 30.52

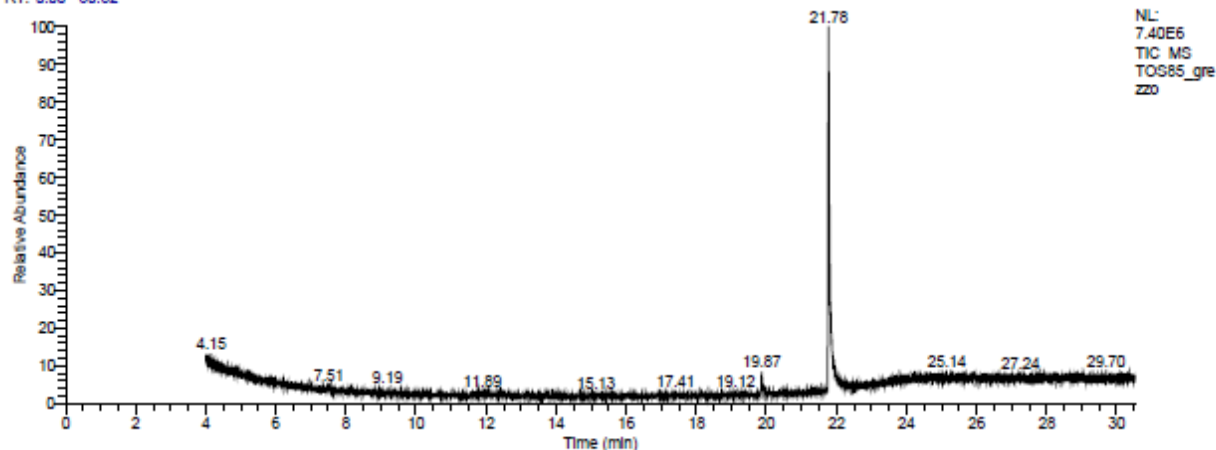

| RT    | Peak Area   | Peak Height | Area % | S/N     |
|-------|-------------|-------------|--------|---------|
| 19.87 | 923481.65   | 427875.45   | 4.14   | 206.64  |
| 21.80 | 6873679.39  | 219309.12   | 30.83  | 105.91  |
| 21.78 | 14499228.34 | 6825108.49  | 65.03  | 3296.11 |

TOS85\_grezzo #10222 RT: 21.78 AV: 1 AV: 5 SB: 12 10215-10220 10224-10229 NL: 2.16E5  
 F: -c Full ms [50.00-400.00]

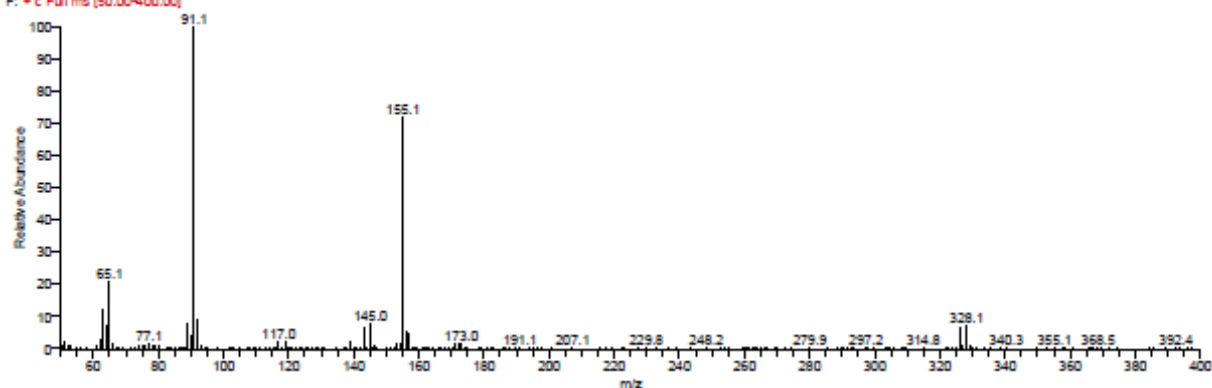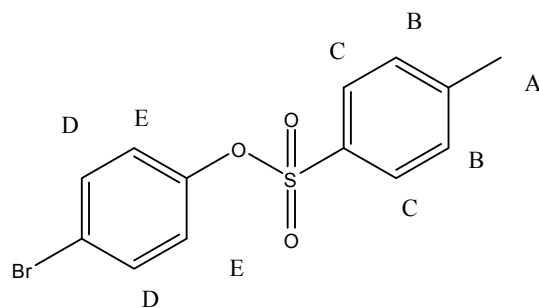

## Sample 18

Data File: TOS63\_MW60grad  
Operator: Paola  
Acquisition Date: 07/29/11 01:19:09 PM  
Run Time(min): 26.53  
Instrument Method: C:\Xcalibur\methods\ecoccontrol400.meth

RT: 0.00 - 30.53

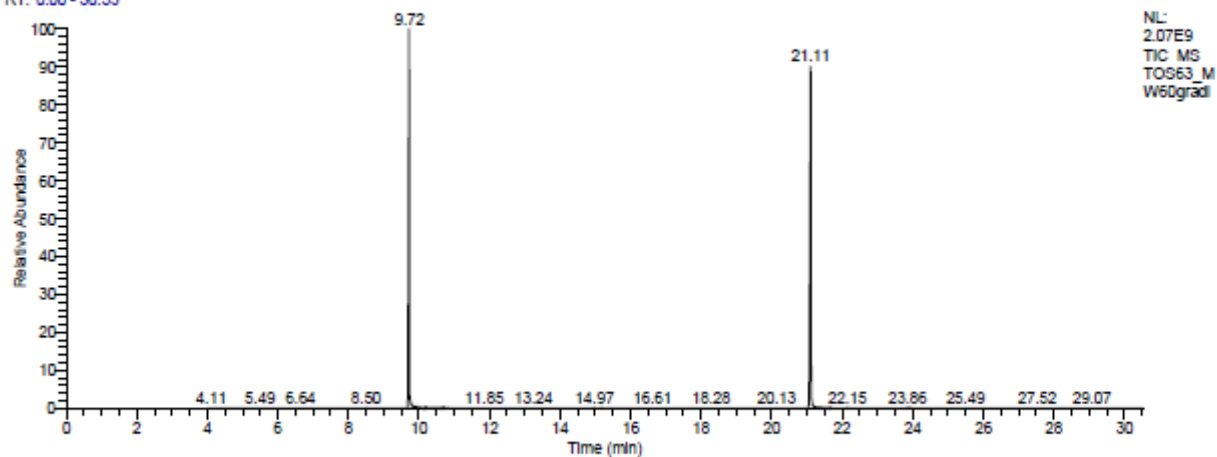

| RT    | Peak Area     | Peak Height   | Area % | S/N       |
|-------|---------------|---------------|--------|-----------|
| 9.72  | 3381467996.87 | 2021445636.17 | 46.85  | 684743.75 |
| 21.11 | 3836870407.67 | 1827657213.13 | 53.15  | 619099.93 |

TOS63\_MW60grad #9833 RT: 21.11 AV: 1 AV: 5 SB: 12 9826-9831 9835-9840 NL: 4.47E8  
F: + c Full ms (50.00-400.00)

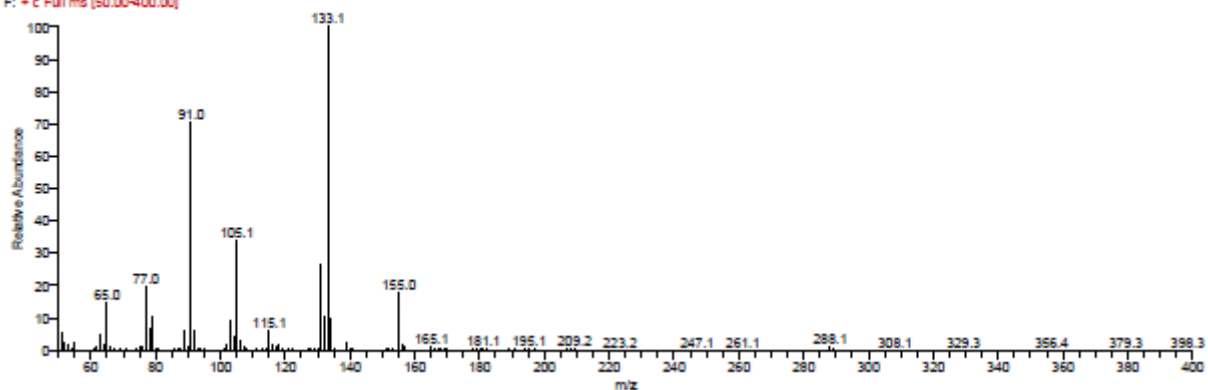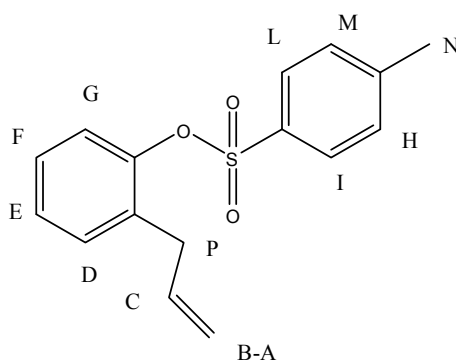

## <sup>1</sup>H-NMR Spectra

### Sample 2

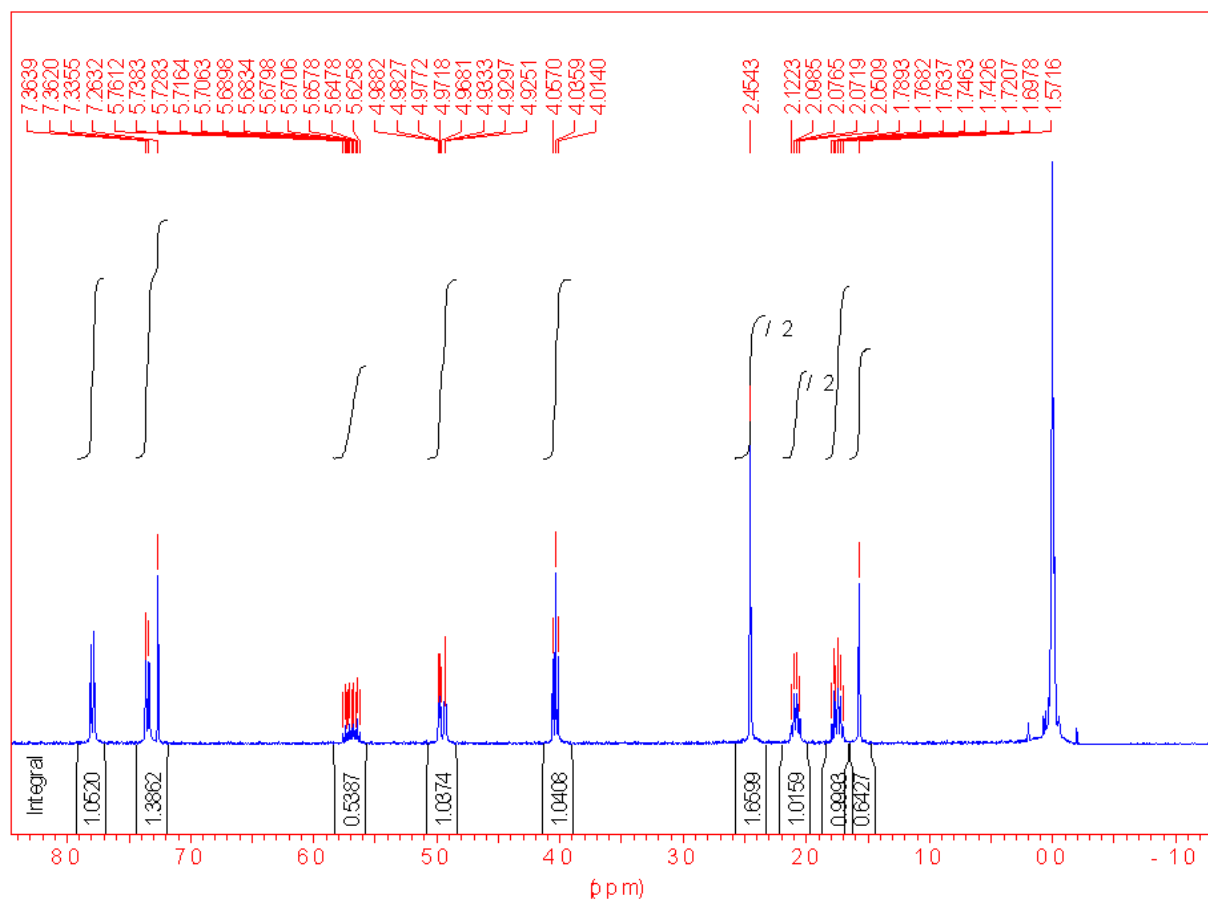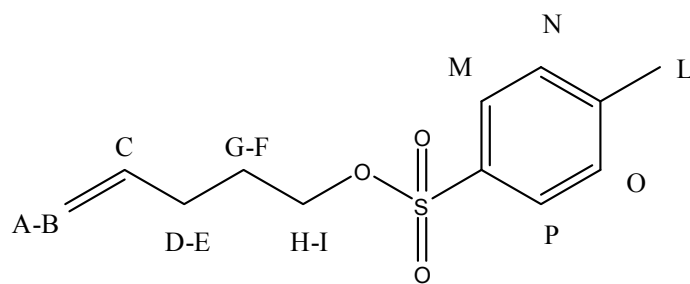



### Sample 14

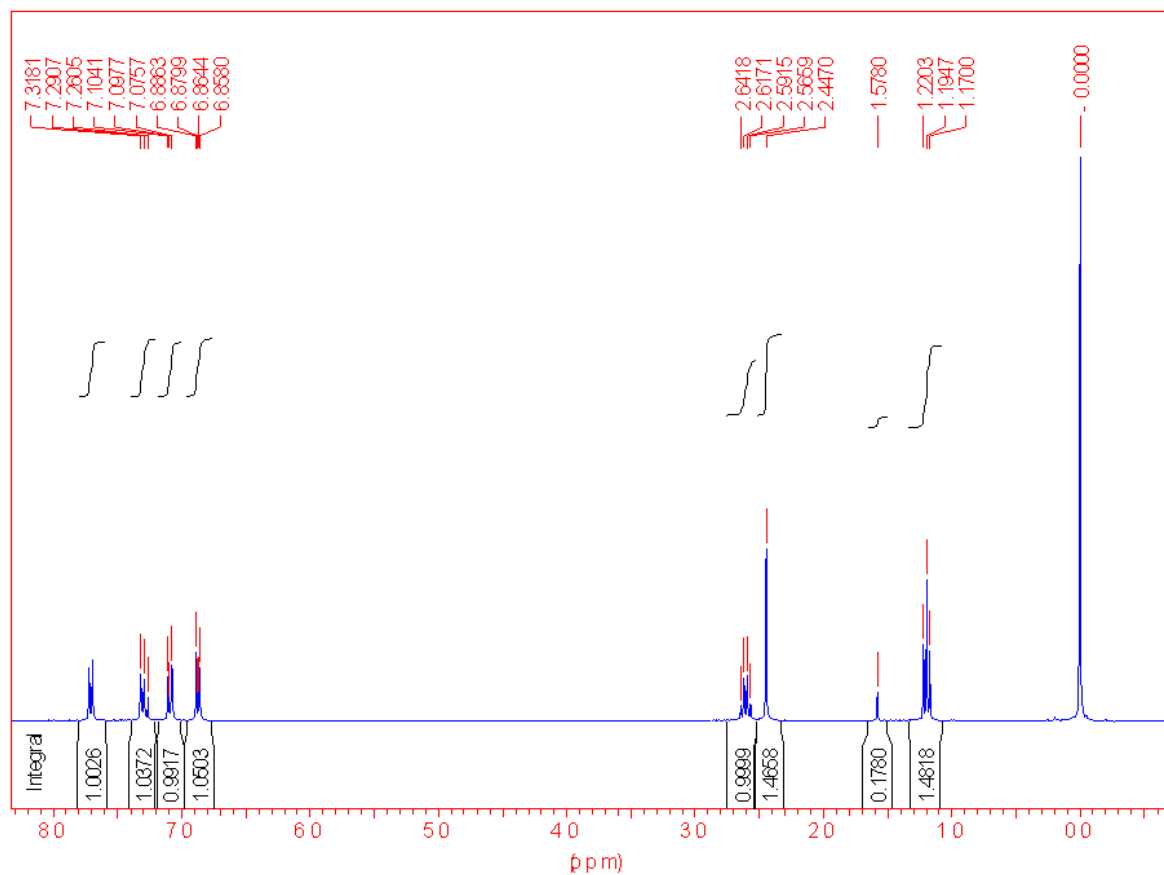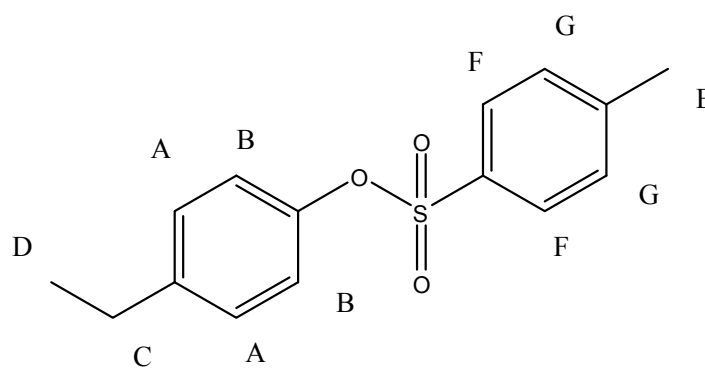

### Sample 15

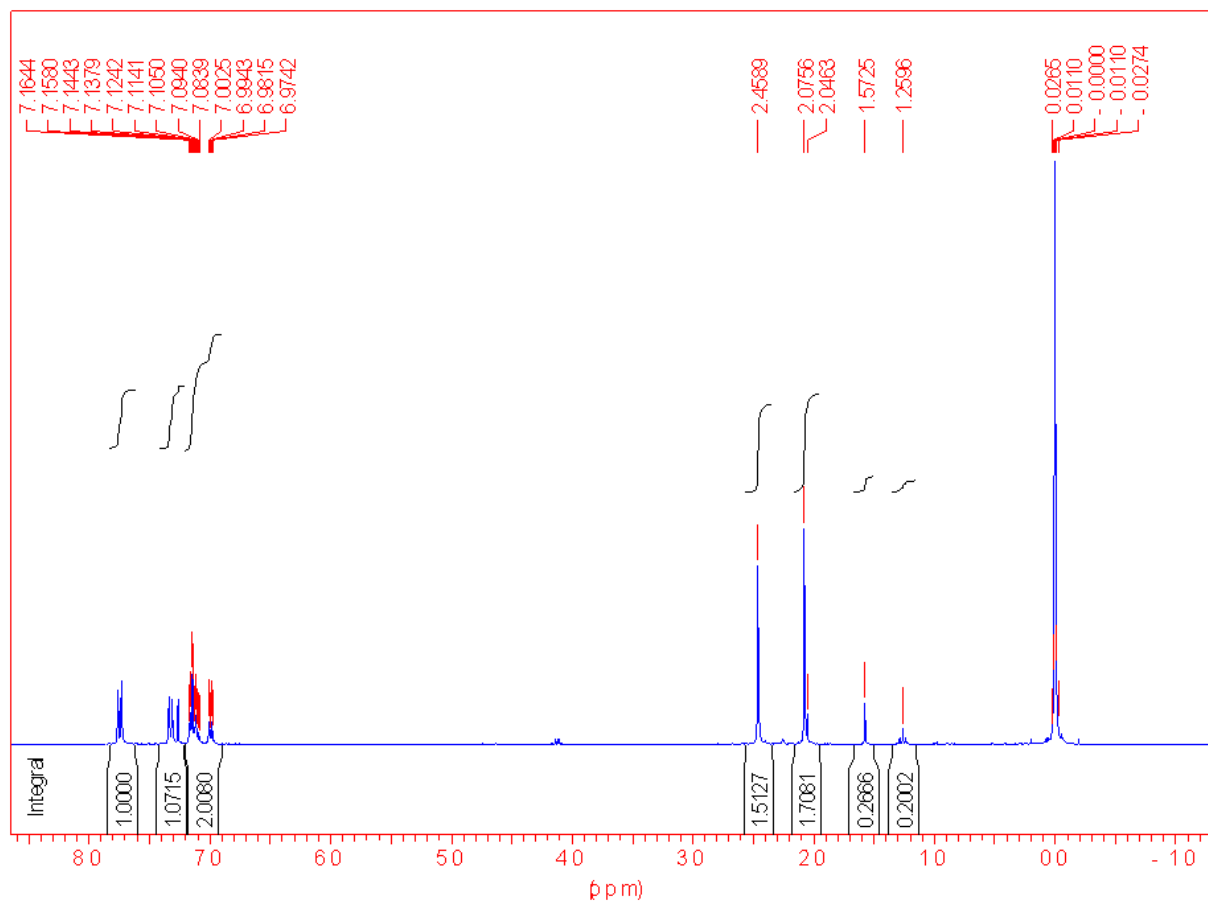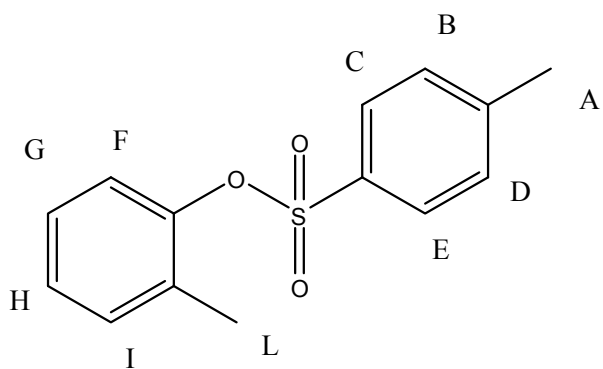

### Sample 16

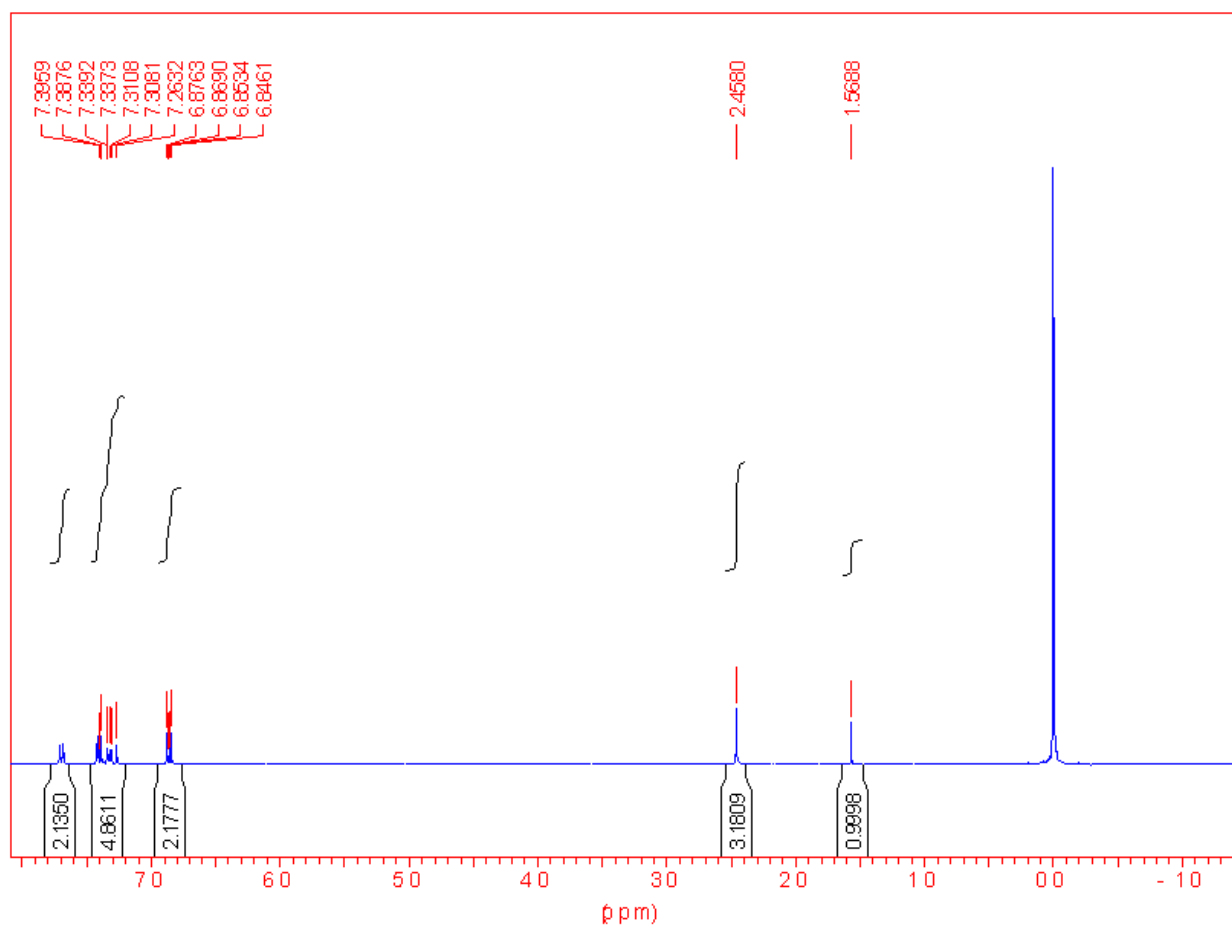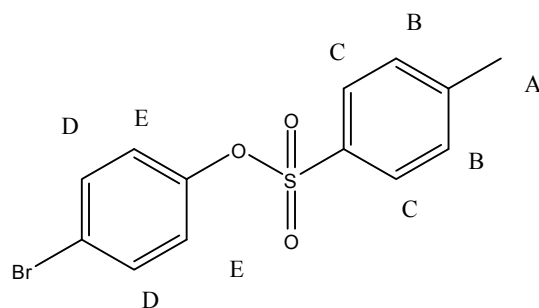



### Sample 18

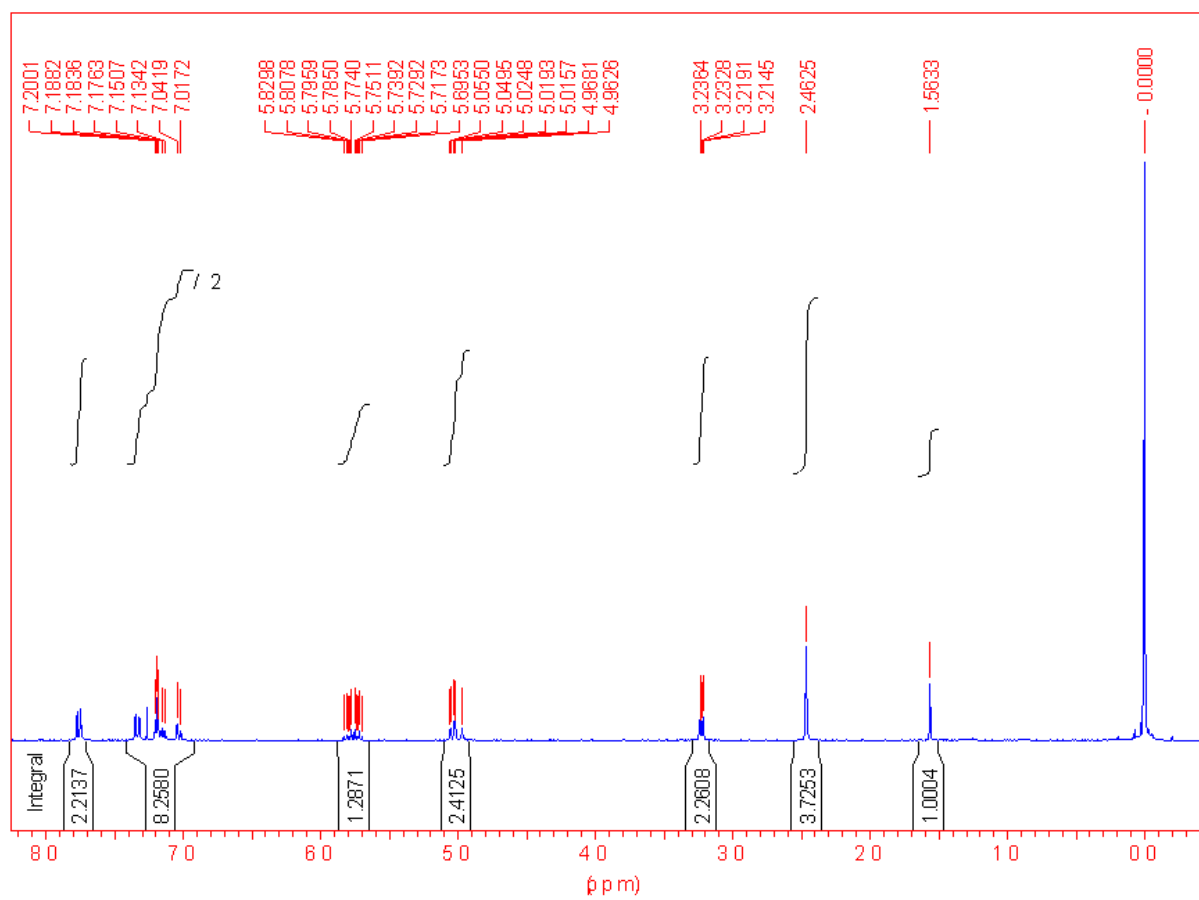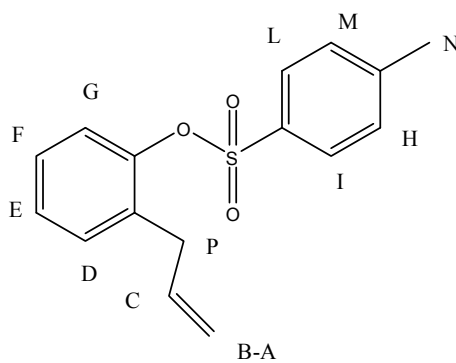

## <sup>13</sup>C-NMR Spectra

### Sample 8

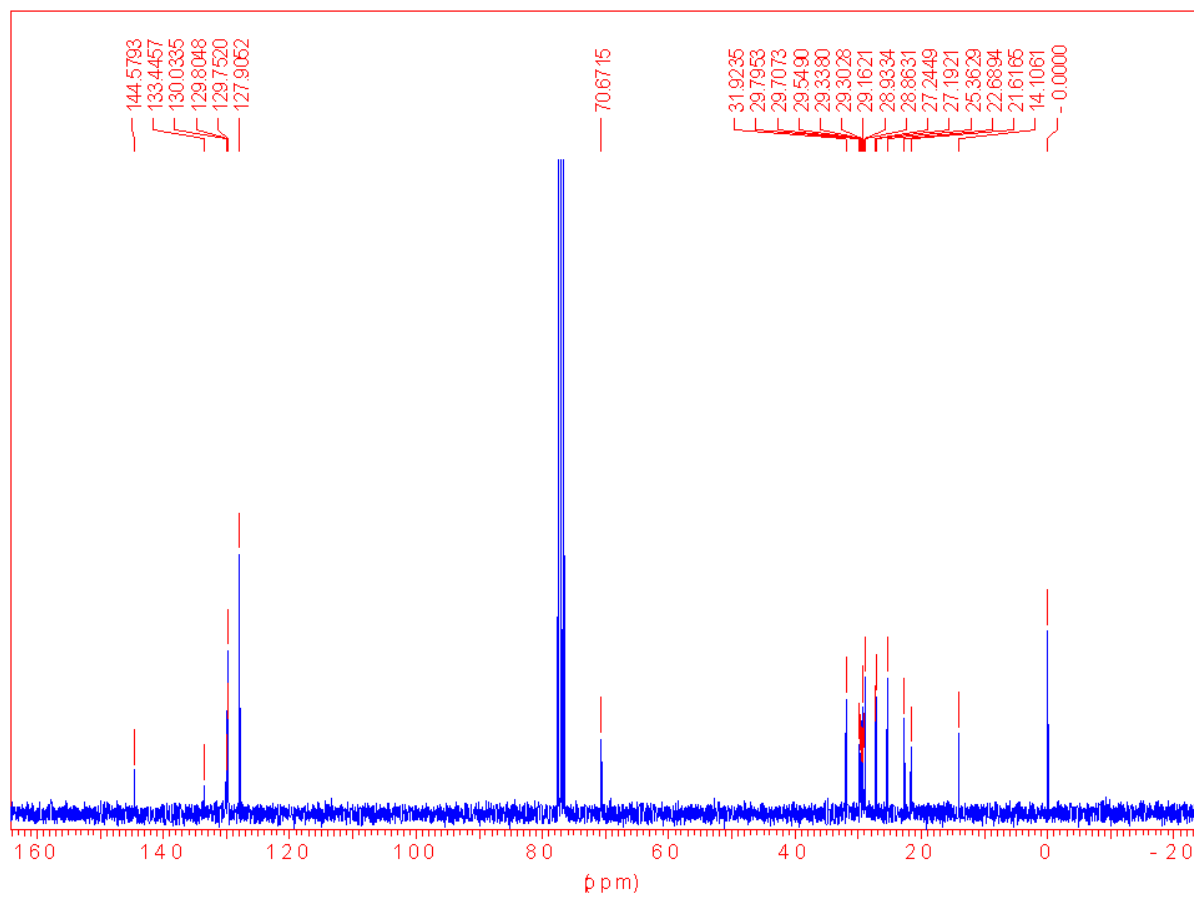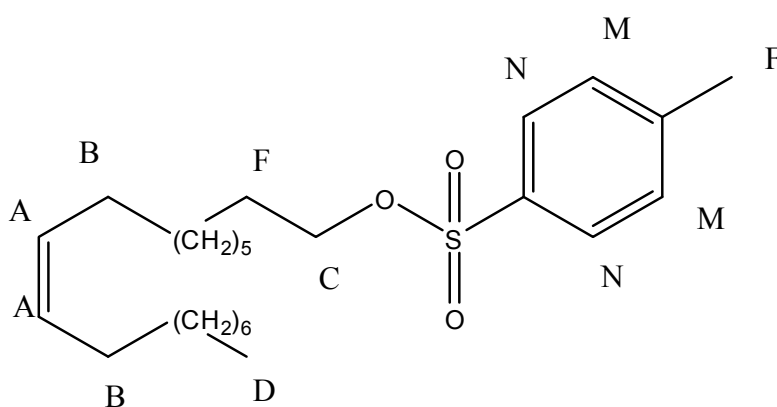

### Sample 14

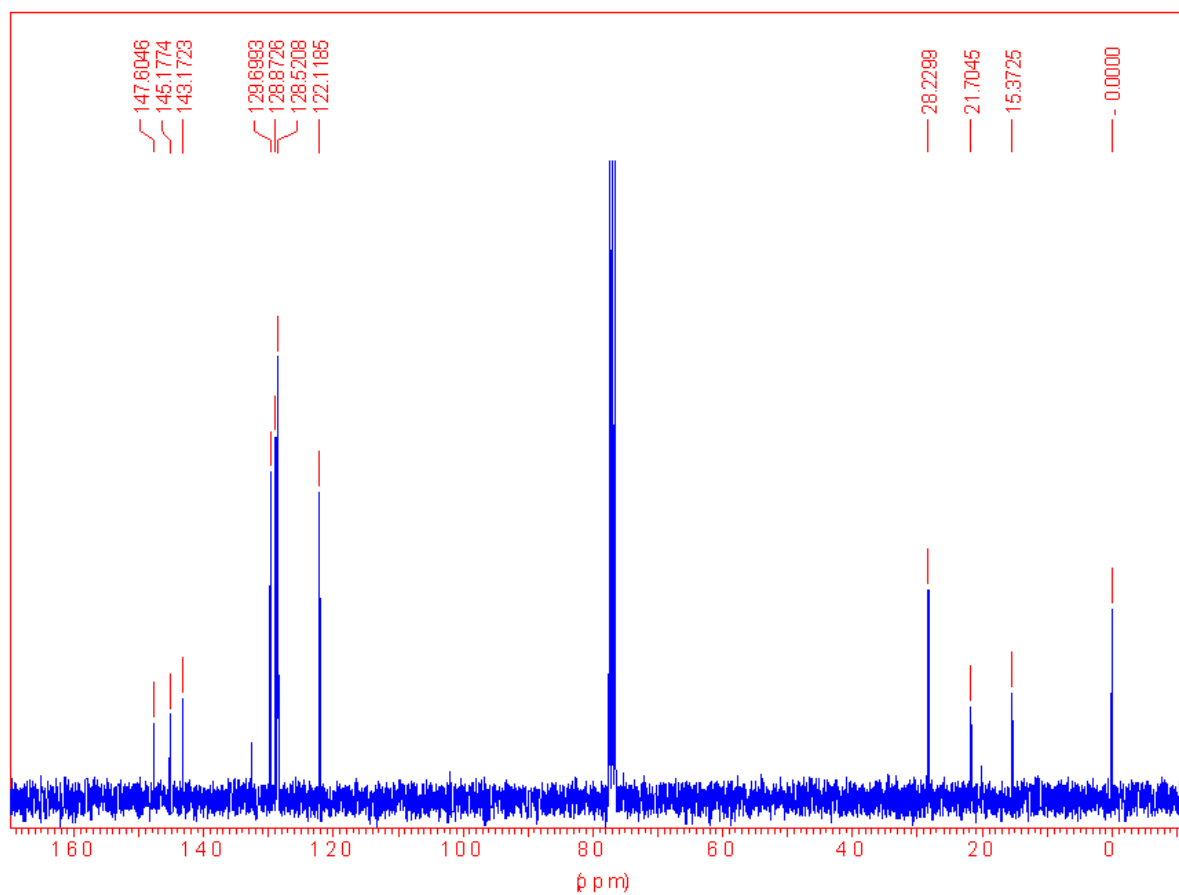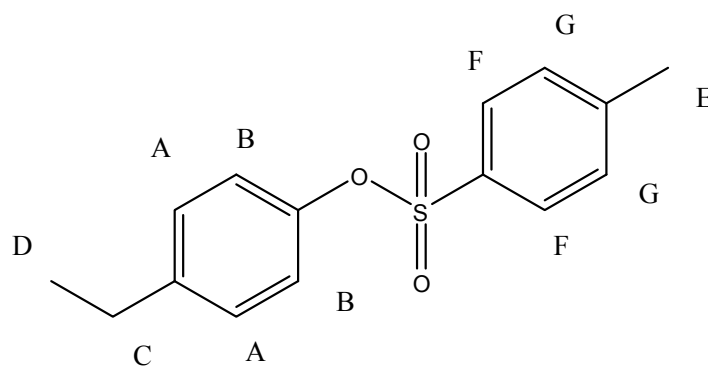

### Sample 15

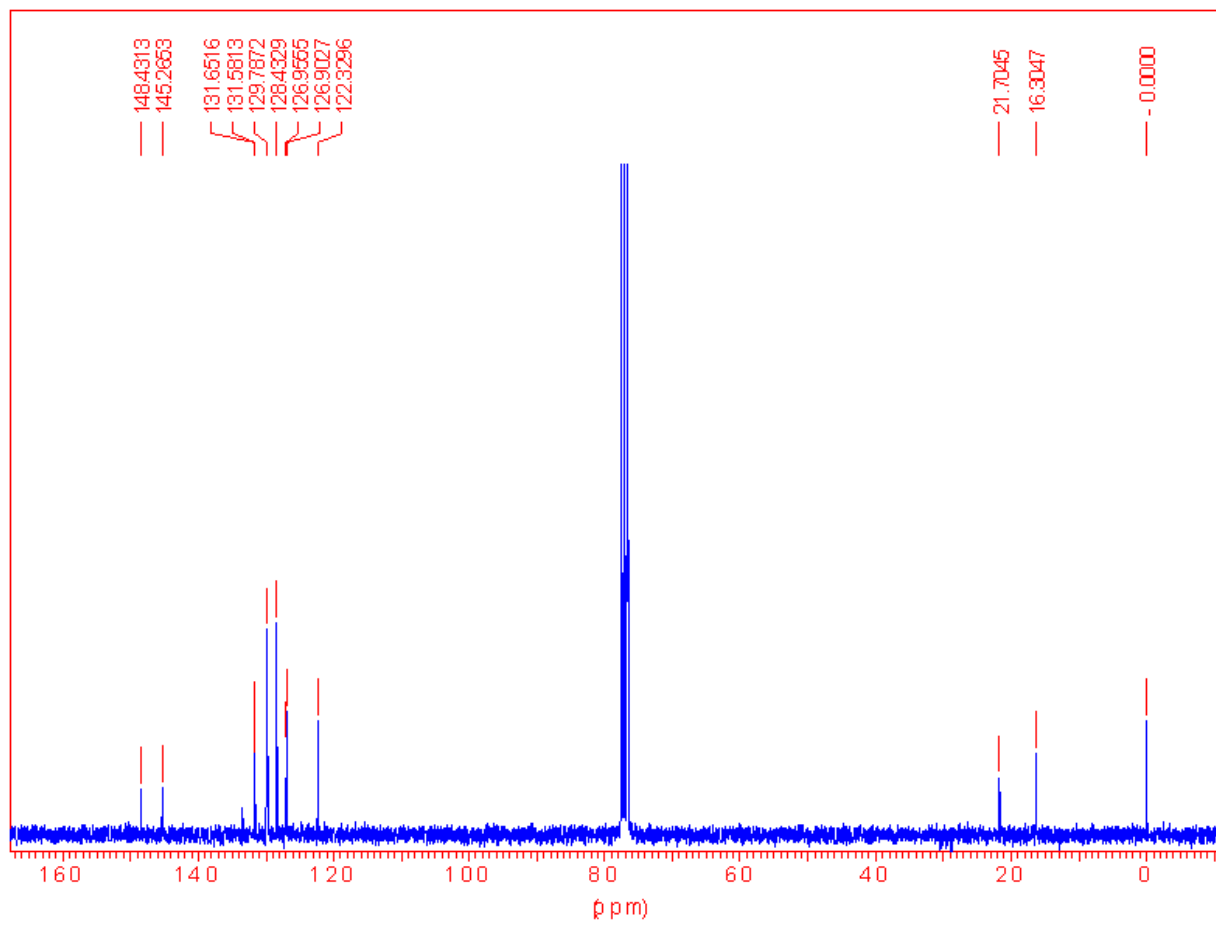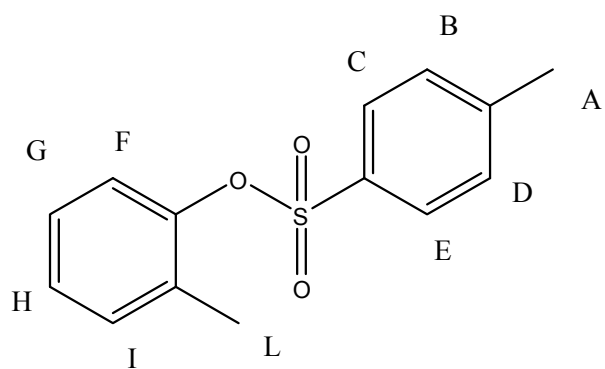

## Sample 16

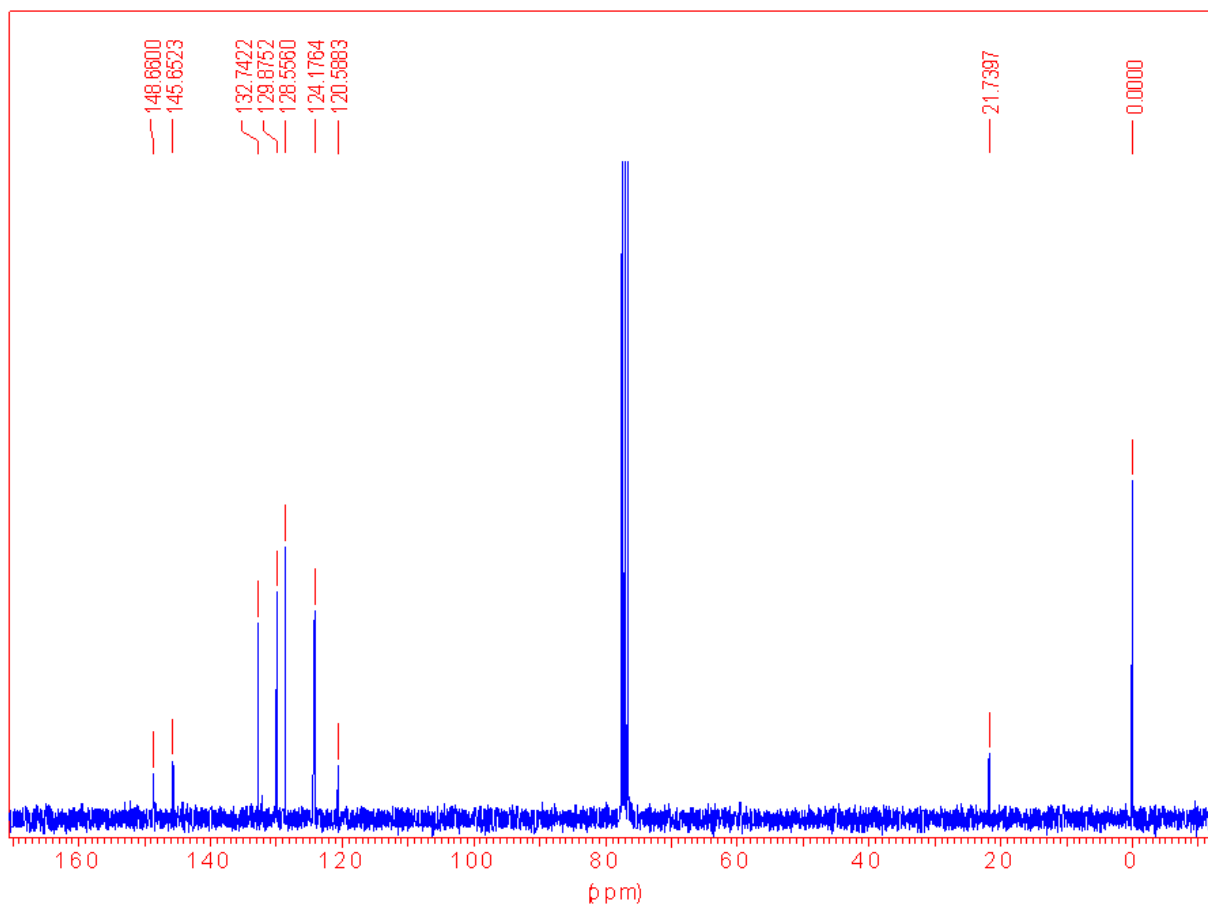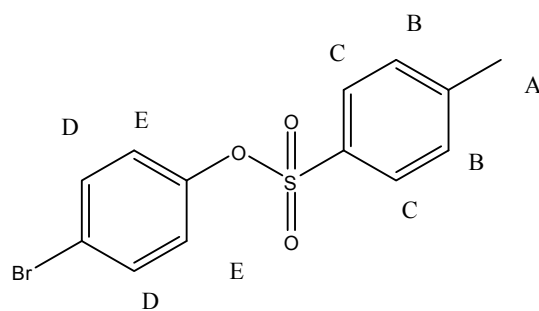

### Sample 18

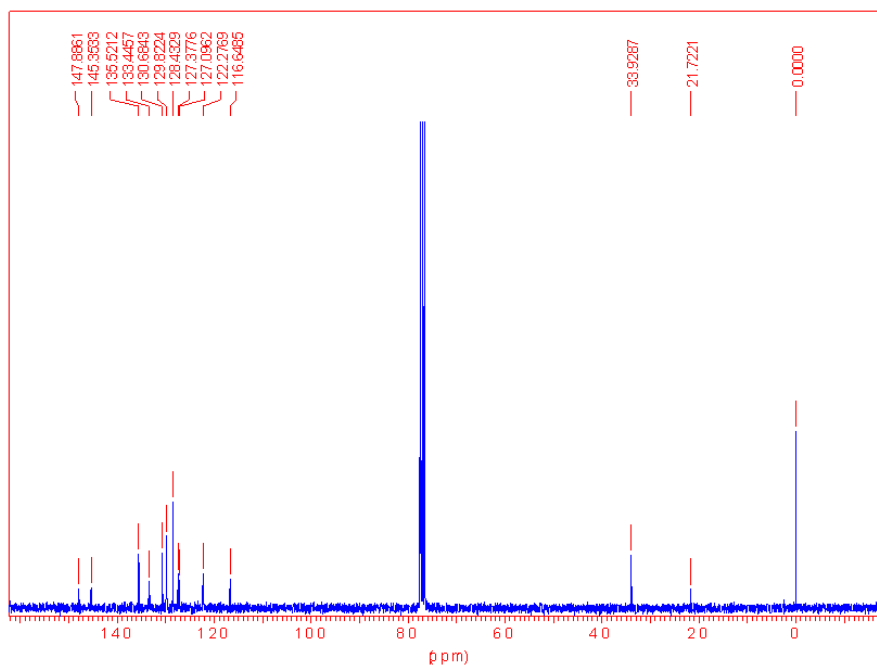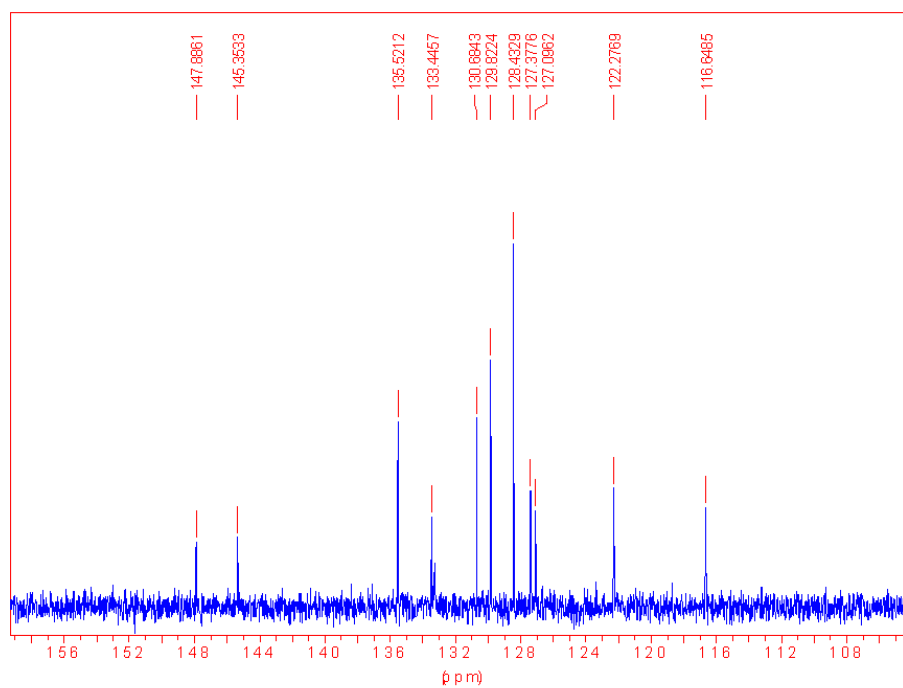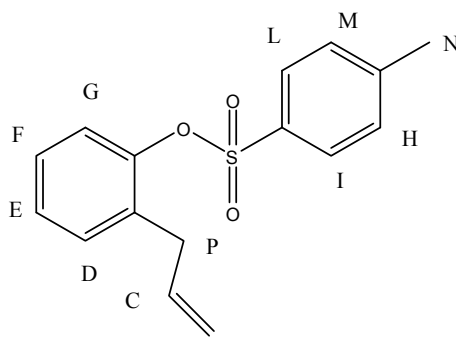

Supplement: c2ra23067d.pdf [file c2ra23067d.pdf]
